# Supplementary material for: Tailoring the delivery of therapeutic ions from bioactive scaffolds while inhibiting their apatite nucleation: a coaxial electrospinning strategy for soft tissue regeneration
Source: Royal Society of Chemistry journal article supplement (doi:10.1039/c6ra25645g), 2017-01-01
Supplement: c6ra25645g1.pdf [file c6ra25645g1.pdf]

Supplementary figures

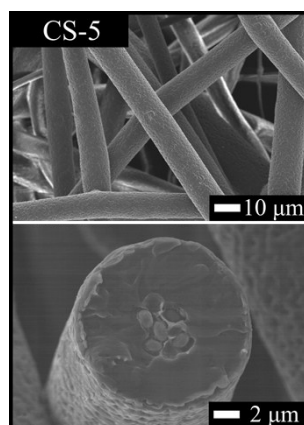

Fig.1. SEM micrographs of fibers and cross-sections morphologies of core-shell fibres with a relative extrusion speed between of the core to the shell of 20.

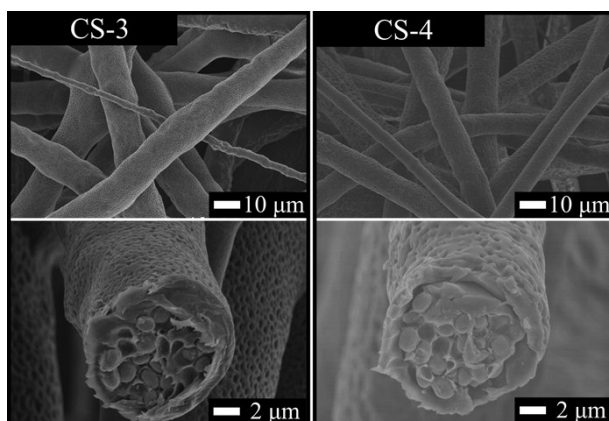

Fig.2. SEM micrographs of fibers and cross-sections morphologies CS-3 and CS-4

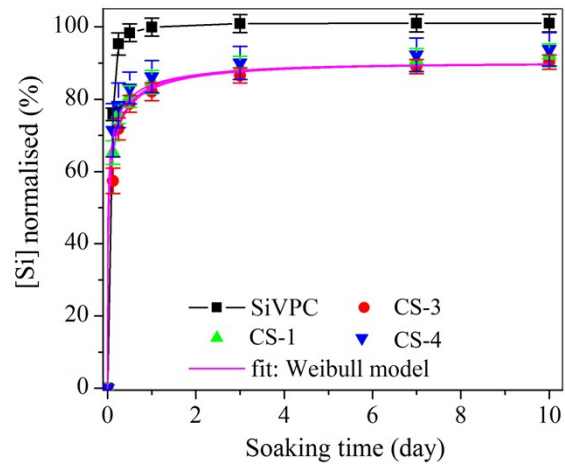

Fig.3. Normalised silicon ions release profiles from core-shell fibres of the same wall-thickness, varying the ratio of lactic to glycolic acid in the PLGA shell layer. The normalised profiles of the core-shell fibres were fitted using Eq. 1
